# Supplementary material for: Greenish yellow-emitting carbon dot-based films for luminescent solar concentrator applications
Source: Royal Society of Chemistry journal article supplement (doi:10.1039/d4tc04133j), 2024-11-12
Supplement: d4tc04133j1.pdf [file d4tc04133j1.pdf]

## **Electronic Supplementary Information**

*Journal of Materials Chemistry C*

### **Greenish yellow-emitting carbon dot-based films for luminescent solar concentrator applications**

Yunxiang Liu, Yoshiki Iso\* and Tetsuhiko Isobe\*

*Department of Applied Chemistry, Faculty of Science and Technology, Keio University,  
3-14-1 Hiyoshi, Kohoku-ku, Yokohama 223-8522, Japan*

\*Corresponding authors.

Yoshiki Iso – E-mail: [iso@applc.keio.ac.jp](mailto:iso@applc.keio.ac.jp); Tel.: +81 45 566 1558; Fax: +81 45 566  
1551; [orcid.org/0000-0001-7483-2828](https://orcid.org/0000-0001-7483-2828)

Tetsuhiko Isobe – E-mail: [isobe@applc.keio.ac.jp](mailto:isobe@applc.keio.ac.jp); Tel.: +81 45 566 1554; Fax: +81 45  
566 1551; [orcid.org/0000-0002-0868-5425](https://orcid.org/0000-0002-0868-5425)

**Table S1** Information of various carbon dots (CDs) in luminescent solar concentrators (LSCs).

| Carbon source                                                                                                                               | Synthesis Method                                                                           | Purification                                                              | $\lambda_{em}$ (nm)         | PLQY                                                                   | Year | Ref.      |
|---------------------------------------------------------------------------------------------------------------------------------------------|--------------------------------------------------------------------------------------------|---------------------------------------------------------------------------|-----------------------------|------------------------------------------------------------------------|------|-----------|
| Citric acid, urea                                                                                                                           | 160/200 °C, 6 h in dimethylformamide (Solvothermal)                                        | Dialysis/<br>Cold precipitation                                           | 500-600                     | 40% / 20-30%<br>in<br>methanol/hexane                                  | 2018 | S1        |
| o-Phenylenediamine, L-tyrosine/dopamine                                                                                                     | 200 °C, 8 h in water (Hydrothermal)                                                        | Filtration,<br>evaporation,<br>dialysis                                   | 555-594/<br>650             | 86.4% / 17.6%<br>in<br>methanol                                        | 2021 | S2        |
| Citric acid, dicyandiamide, 3-aminopropyltriethoxysilane                                                                                    | 200 °C, 12 h in a mixture of ethanol and water (Solvothermal)                              | Centrifugation,<br>washing with water and ethanol                         | 517                         | 49%<br>in<br>organosilicon matrix                                      | 2022 | S3        |
| Citric acid, urea                                                                                                                           | Microwave heating, 5 min, in water                                                         | Filtration                                                                | 500-562                     | -                                                                      | 2017 | S4        |
| Citric acid, urea                                                                                                                           | Microwave heating, 5 min, in water                                                         | Filtration                                                                | 420-560                     | 80%<br>in<br>water                                                     | 2018 | S5        |
| Nitrated pyrenes, boric acid / citric acid, urea, CaCl <sub>2</sub>                                                                         | 180 °C, 12 h in Dimethylformamide / Gradually heated to 250 °C under vacuum (Solvothermal) | Centrifugation,<br>redispersion /<br>Centrifugation,<br>dialysis, drying, | 550-700<br>/<br>450-650     | 65%<br>in<br>toluene /<br>-                                            | 2023 | S6        |
| Citric acid, urea, CaCl <sub>2</sub>                                                                                                        | Microwave heating, 2-6 min                                                                 | Filtration,<br>centrifugation,<br>dialysis                                | 406-550                     | 15-73%<br>in<br>ethanol                                                | 2024 | S7        |
| Citric acid, L-cysteamine hydrochloride / Citric acid, urea / 1,3,5-Benzenetricarboxylic acid, 3,4,9,10-perylenetetracarboxylic dianhydride | Vacuum heating/Solvothermal                                                                | Silica gel chromatography,<br>dialysis                                    | 495<br>/<br>516<br>/<br>584 | 90-72%<br>in<br>ethanol                                                | 2024 | S8        |
| Citric acid, urea, CaCl <sub>2</sub>                                                                                                        | Space-confined vacuum heating                                                              | Centrifugation,<br>dialysis                                               | 500                         | 65%<br>in<br>methanol                                                  | 2021 | S9        |
| <i>p</i> -Phenylenediamine                                                                                                                  | 250 °C, 12 h in diphenyl ether (Ambient air heating)                                       | Centrifugation and silica gel column chromatography                       | 540                         | 56% / 30-56%<br>in<br>chloroform /<br>ethylene-vinyl acetate copolymer |      | This work |

White light

UV light

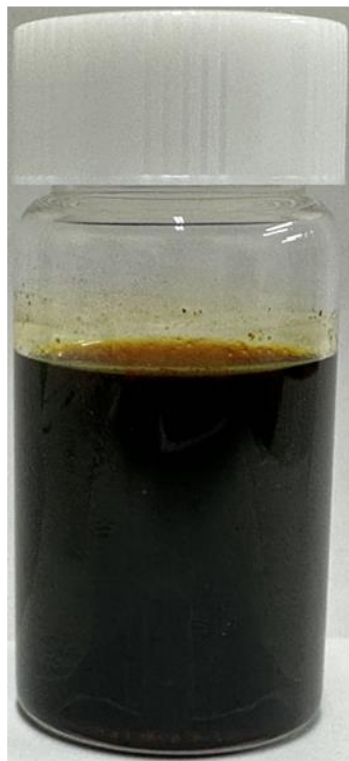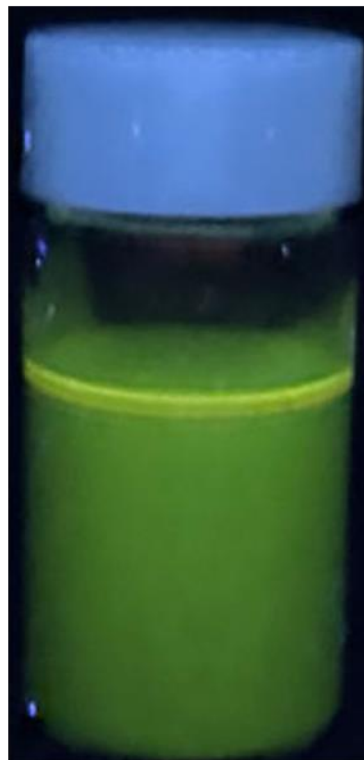

**Fig. S1** Photographs of black suspension under white light and 365 nm UV light.

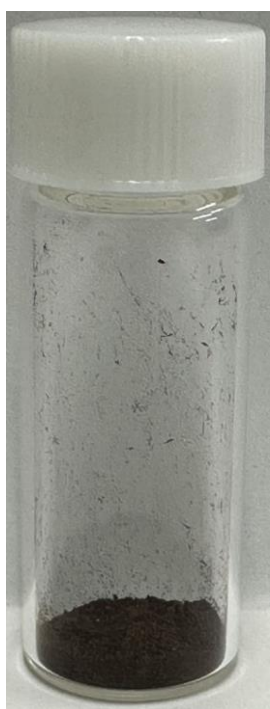

Crude CDs : 154 mg

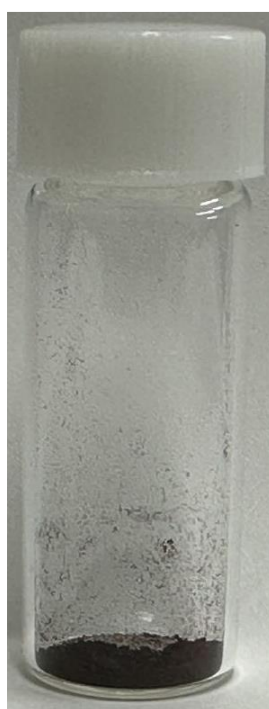

Purified CDs : 50 mg

**Fig. S2** Photographs of crude CDs and purified CDs

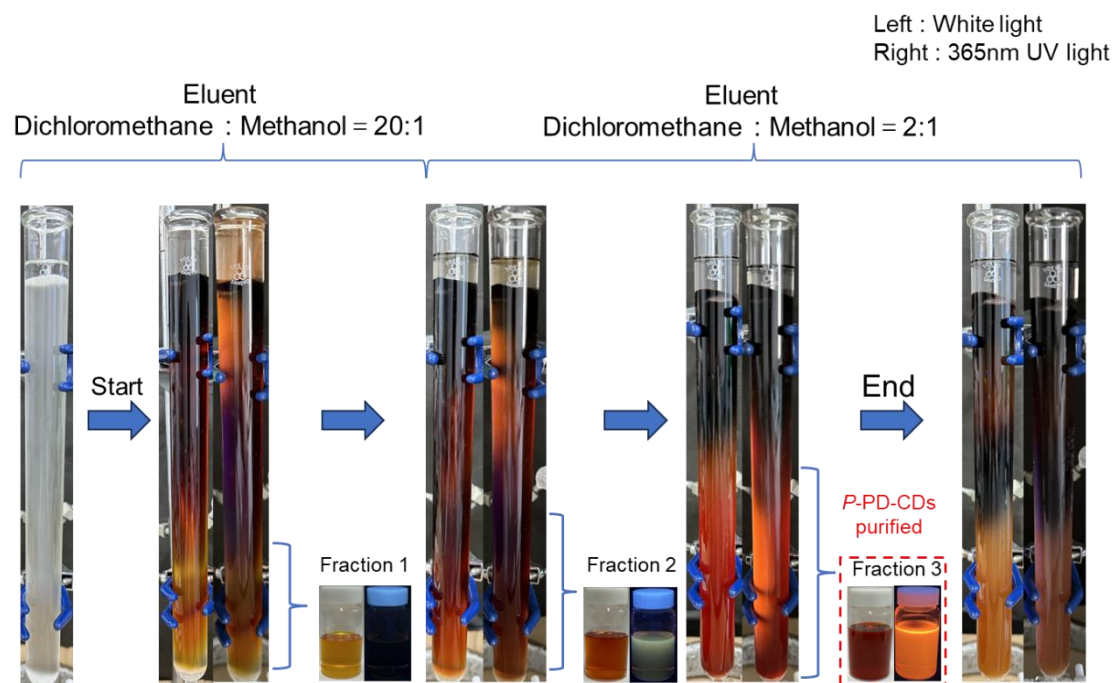

**Fig. S3** Purification of crude CDs by silica gel column chromatography.

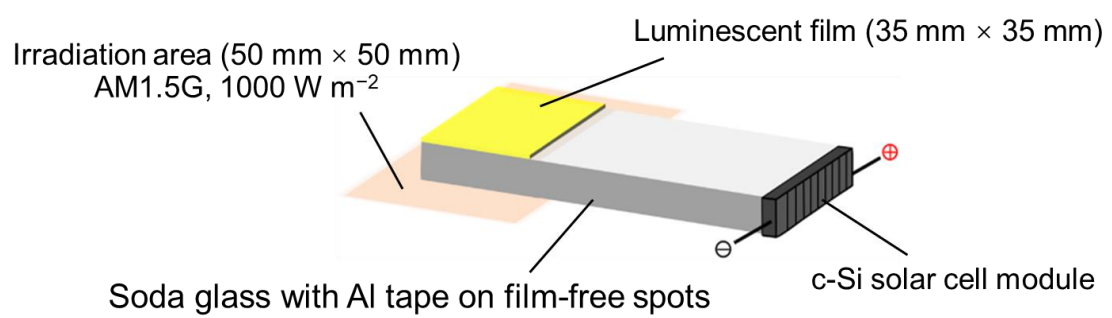

**Fig. S4** Evaluation of LSC device with CDs@EVA films.

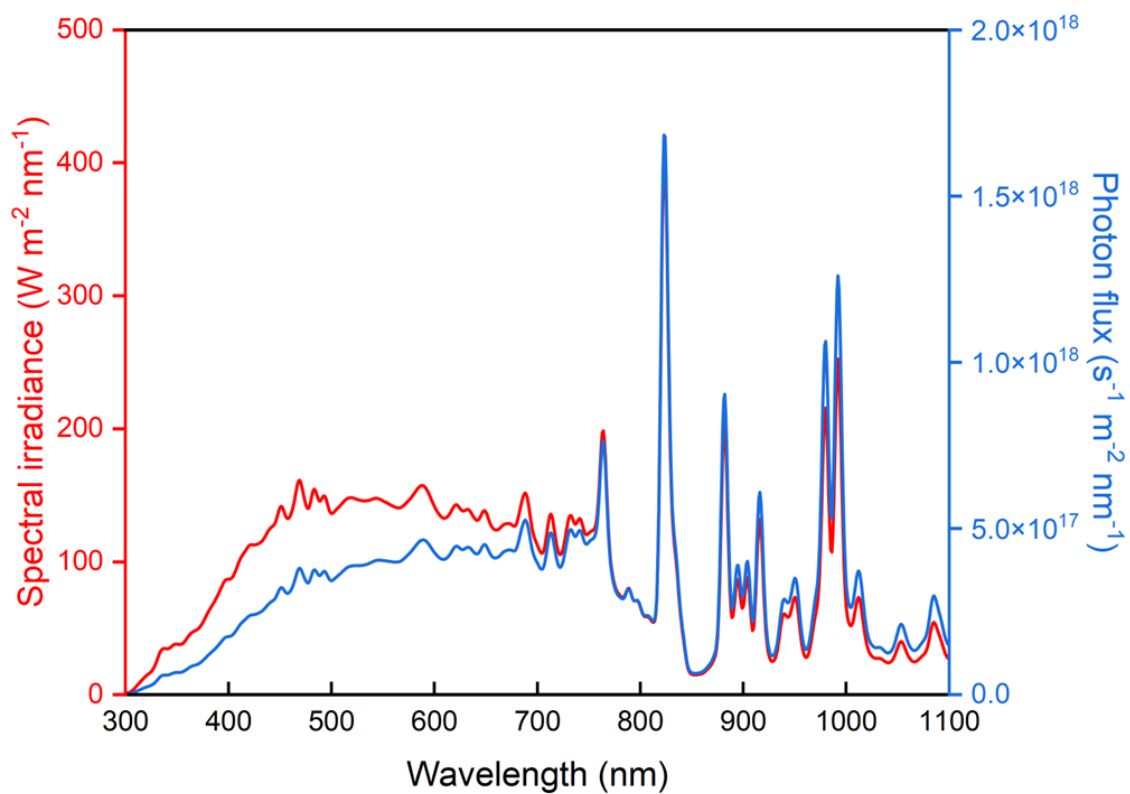

**Fig. S5** Change in spectral irradiance (red) and photon flux (blue) of AM1.5G simulated sunlight as a function of wavelength.

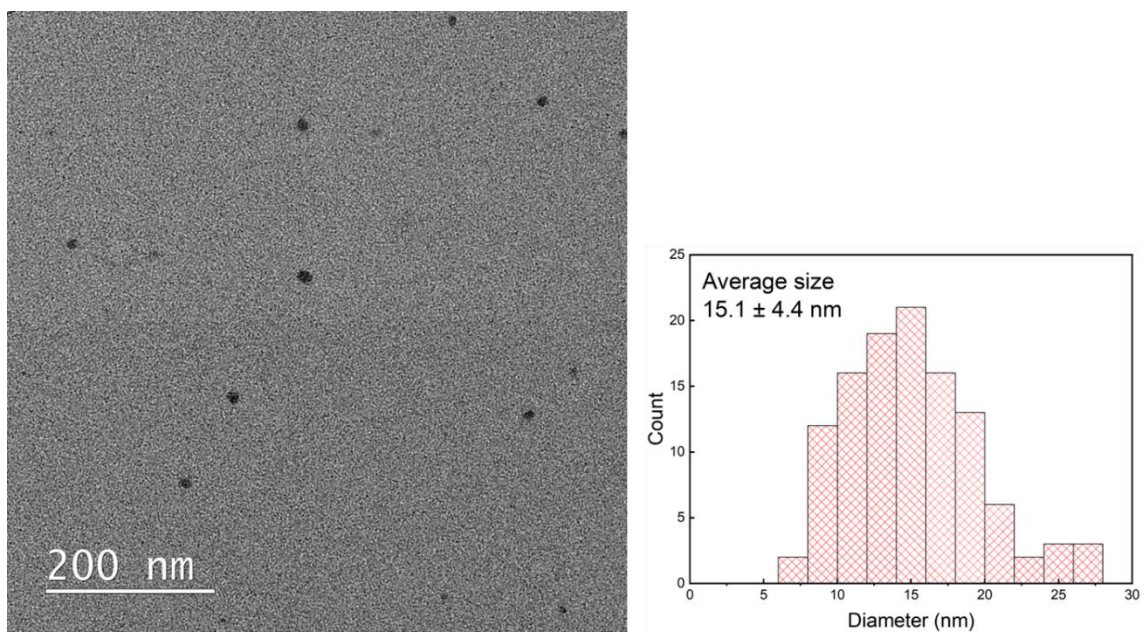

**Fig. S6** FE-TEM image of purified CDs and their size distribution.



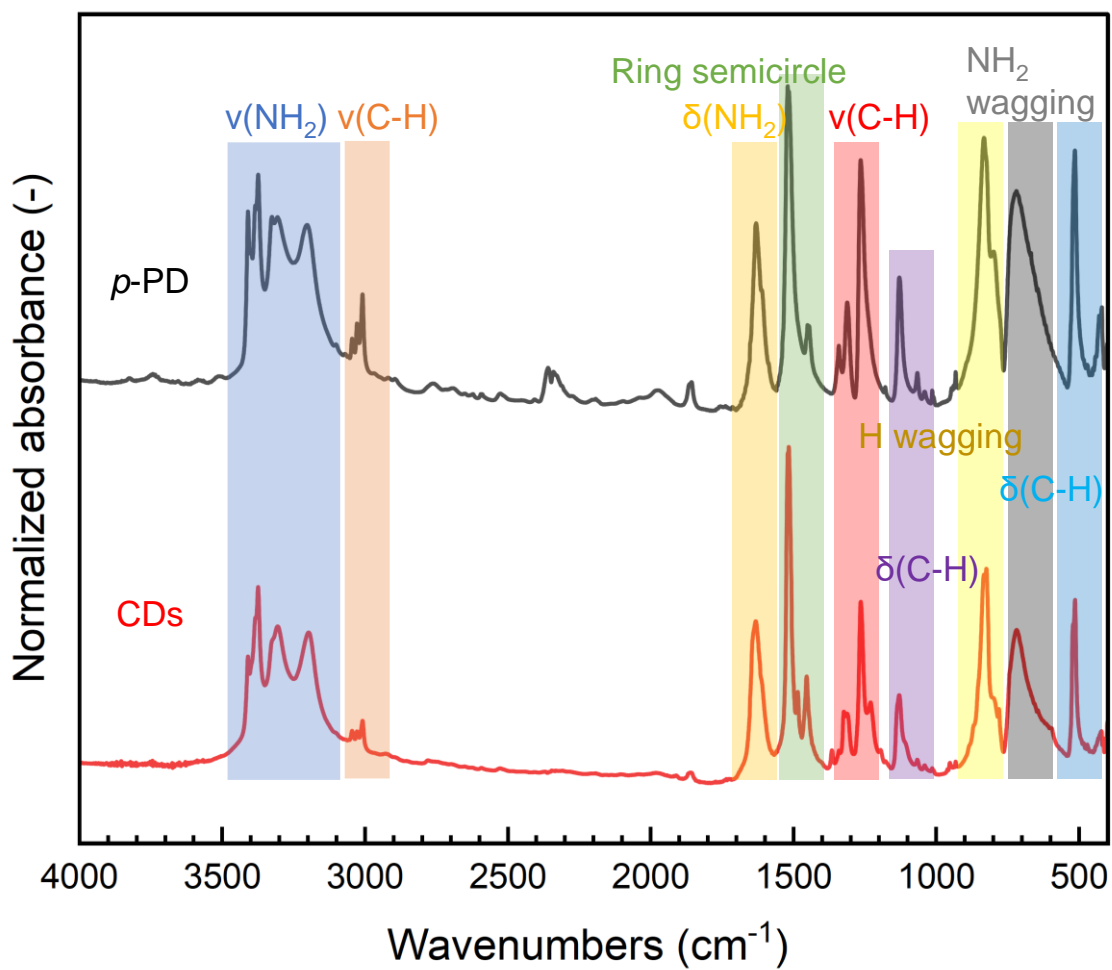

**Fig. S7** FT-IR spectra of *p*-PD and purified CDs.

White light

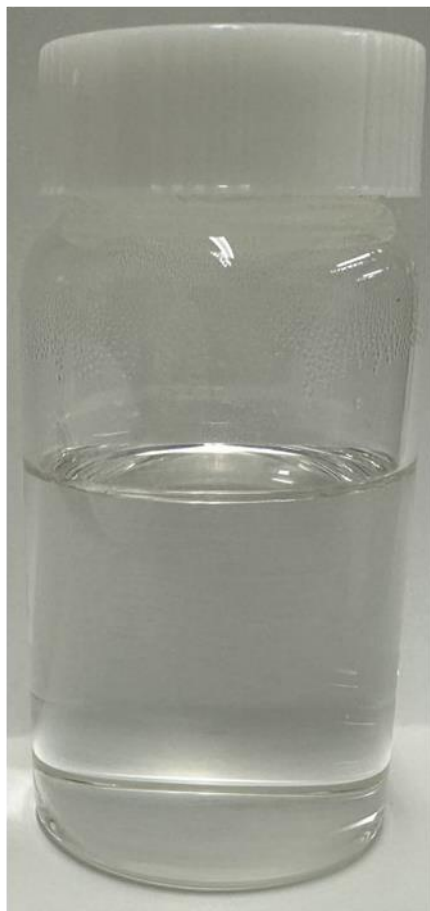

UV light

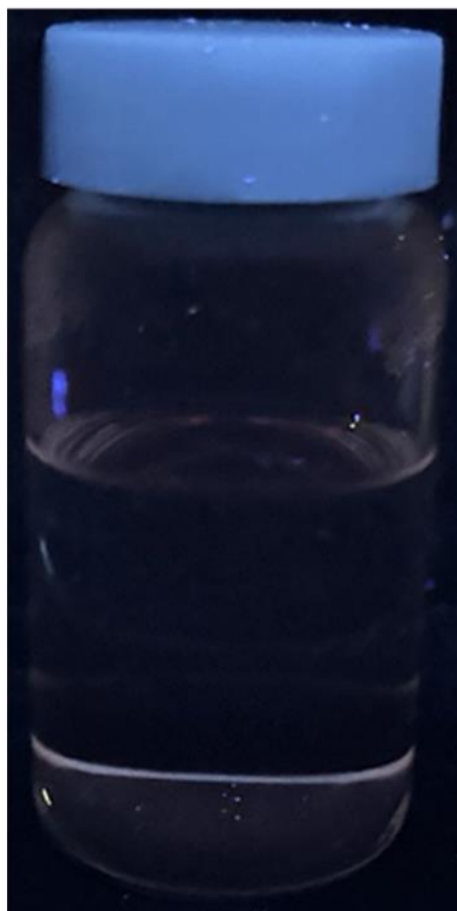

**Fig. S8** Photographs of *p*-PD chloroform solution under the white light and 365 nm UV light.

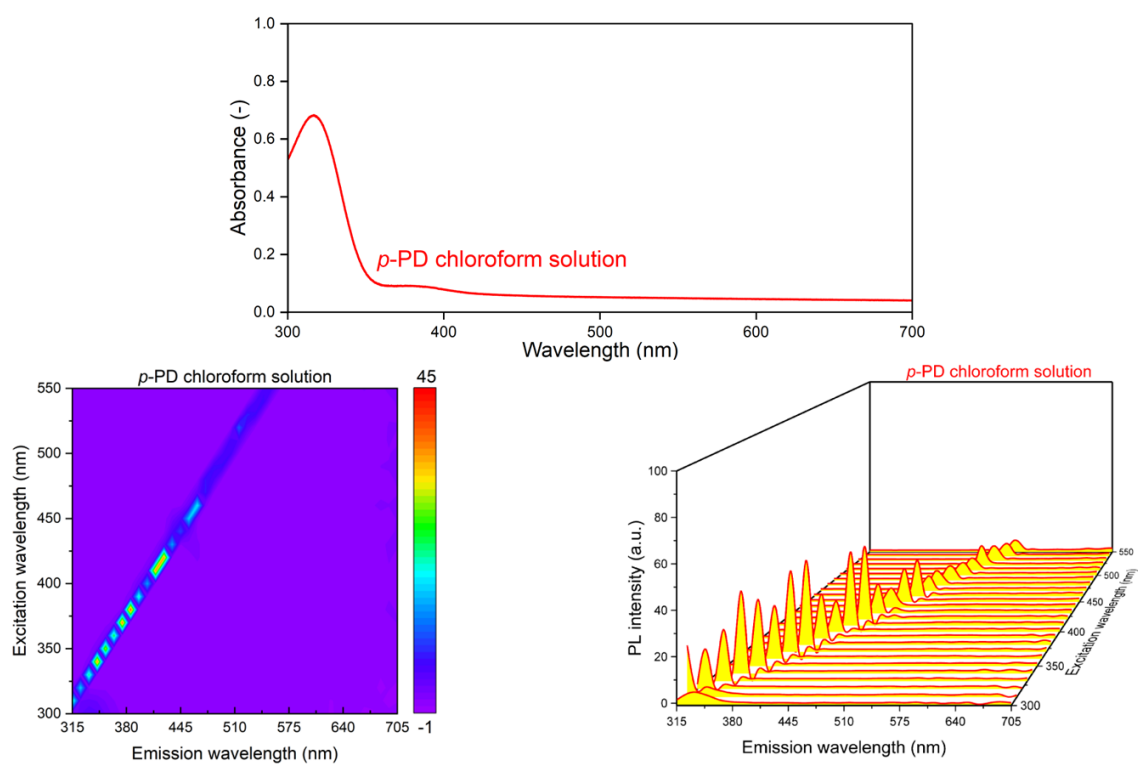

**Fig. S9** UV-vis spectrum, PL/PLE mapping, and three-dimensional PL/PLE spectrum of the *p*-PD chloroform solution.

**Table S2** PL/PLE properties of three different synthesized and purified CDs in chloroform.

| Sample No. | $\lambda_{\text{ex}}$ (nm) | $\lambda_{\text{em}}$ (nm) | Storks shift (nm) | PLQY (%) |
|------------|----------------------------|----------------------------|-------------------|----------|
| 1          | 470                        | 550                        | 80                | 53       |
| 2          | 470                        | 549                        | 79                | 60       |
| 3          | 470                        | 550                        | 80                | 55       |
| Average    | 470                        | 550                        | 80                | 56       |

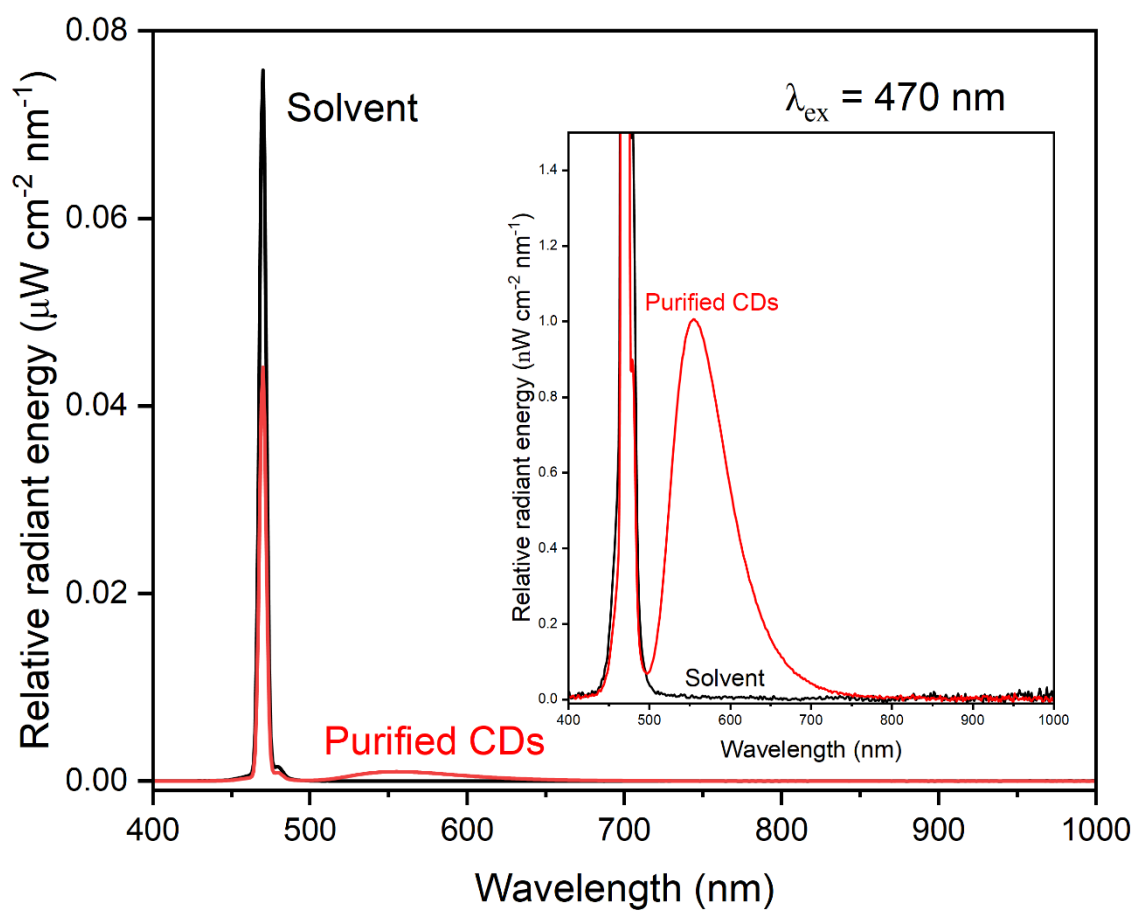

**Fig. S10** PL spectra for evaluating the PLQY of the purified CDs in chloroform.

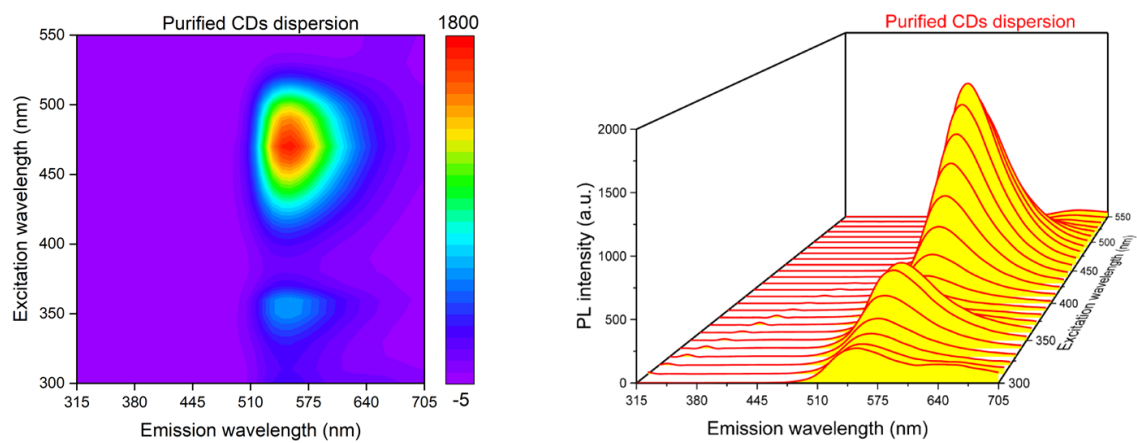

**Fig. S11** PL/PLE mapping and three-dimensional PL/PLE spectra of the purified CDs in chloroform.

**Table S3** The used volumes of EVA solution containing CDs, film thicknesses, emission peak wavelengths,  $\lambda_{em}$ , and PLQYs for the films with different CD concentrations.

| Sample name | CD concentration (wt%) | Volume (mL) | Film thickness ( $\mu\text{m}$ ) | $\lambda_{em}$ (nm) | PLQY (%) |
|-------------|------------------------|-------------|----------------------------------|---------------------|----------|
| EVA         | 0.00                   | 5           | $148 \pm 2$                      | -                   | -        |
| CDs@EVA #1  | 0.05                   | 5           | $140 \pm 2$                      | 493                 | 56       |
| CDs@EVA #2  | 0.05                   | 10          | $275 \pm 1$                      | 493                 | 50       |
| CDs@EVA #3  | 0.05                   | 15          | $408 \pm 2$                      | 493                 | 49       |
| CDs@EVA #4  | 0.05                   | 20          | $488 \pm 3$                      | 493                 | 49       |
| CDs@EVA #5  | 0.10                   | 5           | $132 \pm 2$                      | 490                 | 39       |
| CDs@EVA #6  | 0.10                   | 10          | $294 \pm 3$                      | 490                 | 36       |
| CDs@EVA #7  | 0.10                   | 15          | $421 \pm 4$                      | 490                 | 35       |
| CDs@EVA #8  | 0.15                   | 5           | $137 \pm 2$                      | 486                 | 35       |
| CDs@EVA #9  | 0.15                   | 10          | $283 \pm 2$                      | 486                 | 32       |
| CDs@EVA #10 | 0.15                   | 15          | $409 \pm 3$                      | 486                 | 30       |

# White light

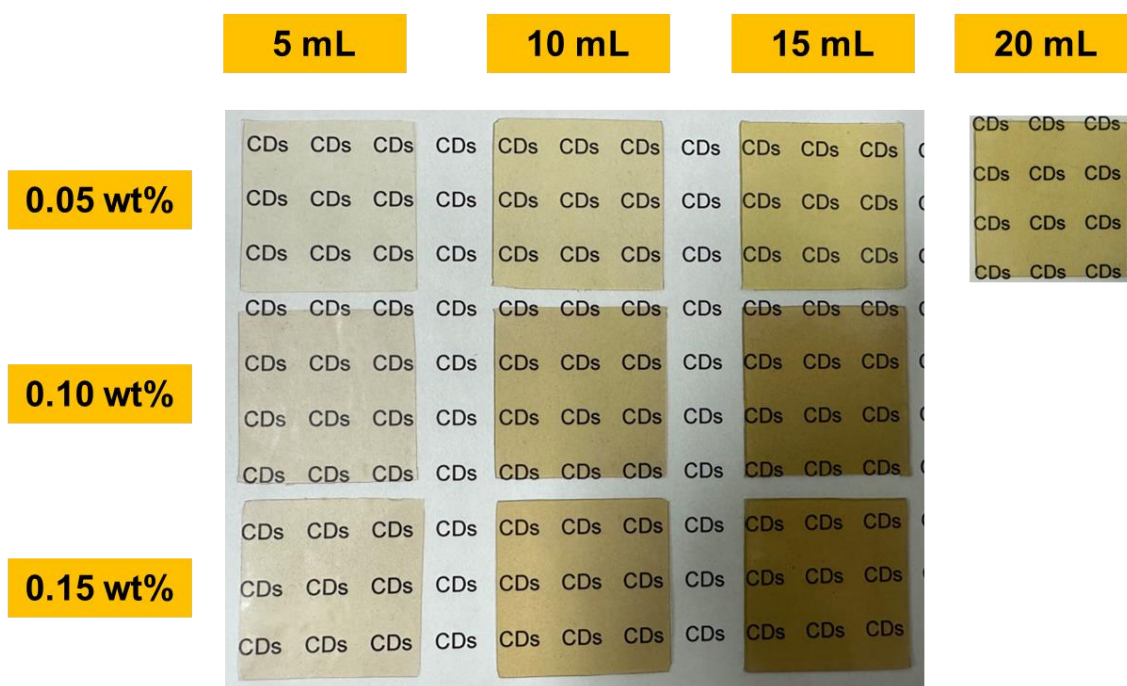

**Fig. S12A** Photographs of CDs@EVA films with different CD concentrations and thicknesses under white light.



## UV light

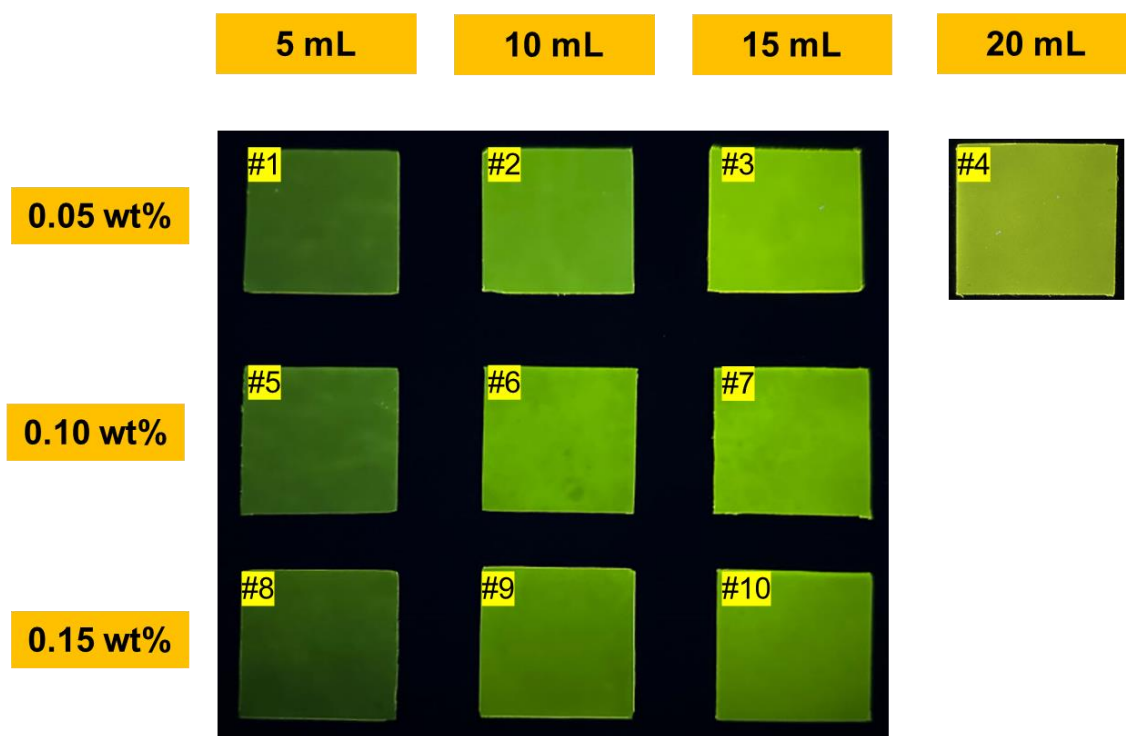

**Fig. S12B** Photographs of CDs@EVA films with different CD concentrations and thicknesses under 365 nm UV light.

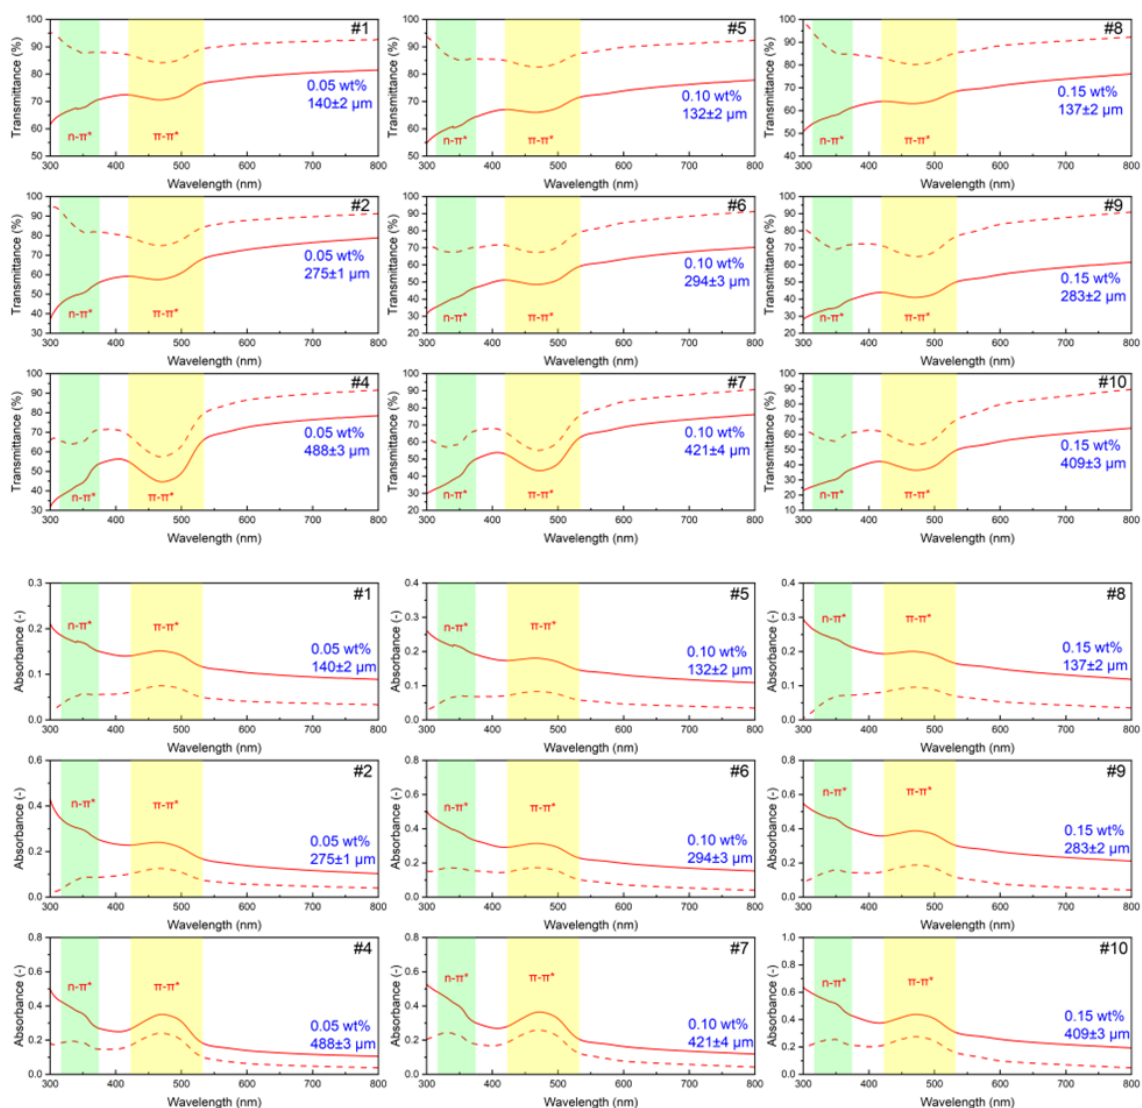

**Fig. S13** In-line transmission (solid lines) and total transmission (dashed lines) spectra, and in-line absorbance (solid lines) and total absorbance (dashed lines) spectra of EVA and CDs@EVA films with different CD concentrations and thicknesses.

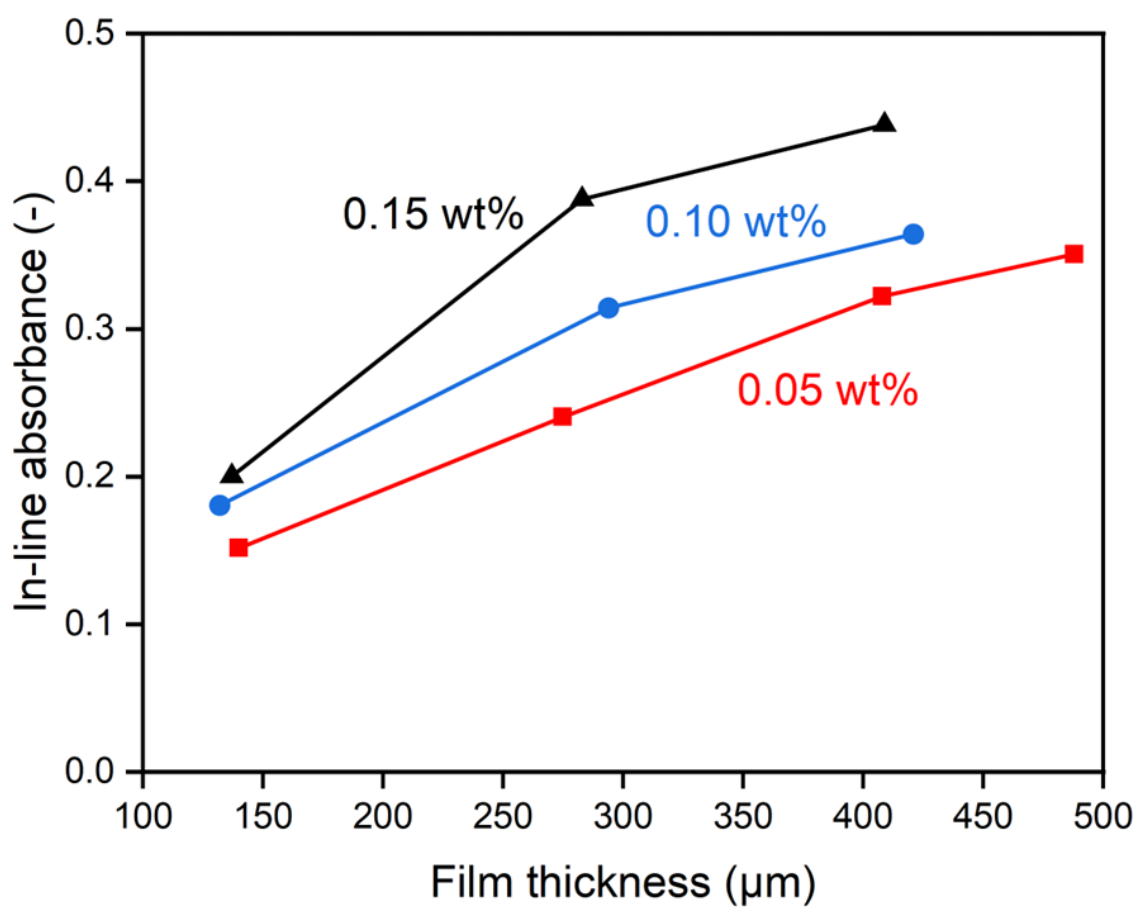

**Fig. S14** Change in in-line absorbance of CD@EVA films with different CD concentrations (0.05 wt%, 0.10 wt%, and 0.15 wt%) as a function of film thickness.

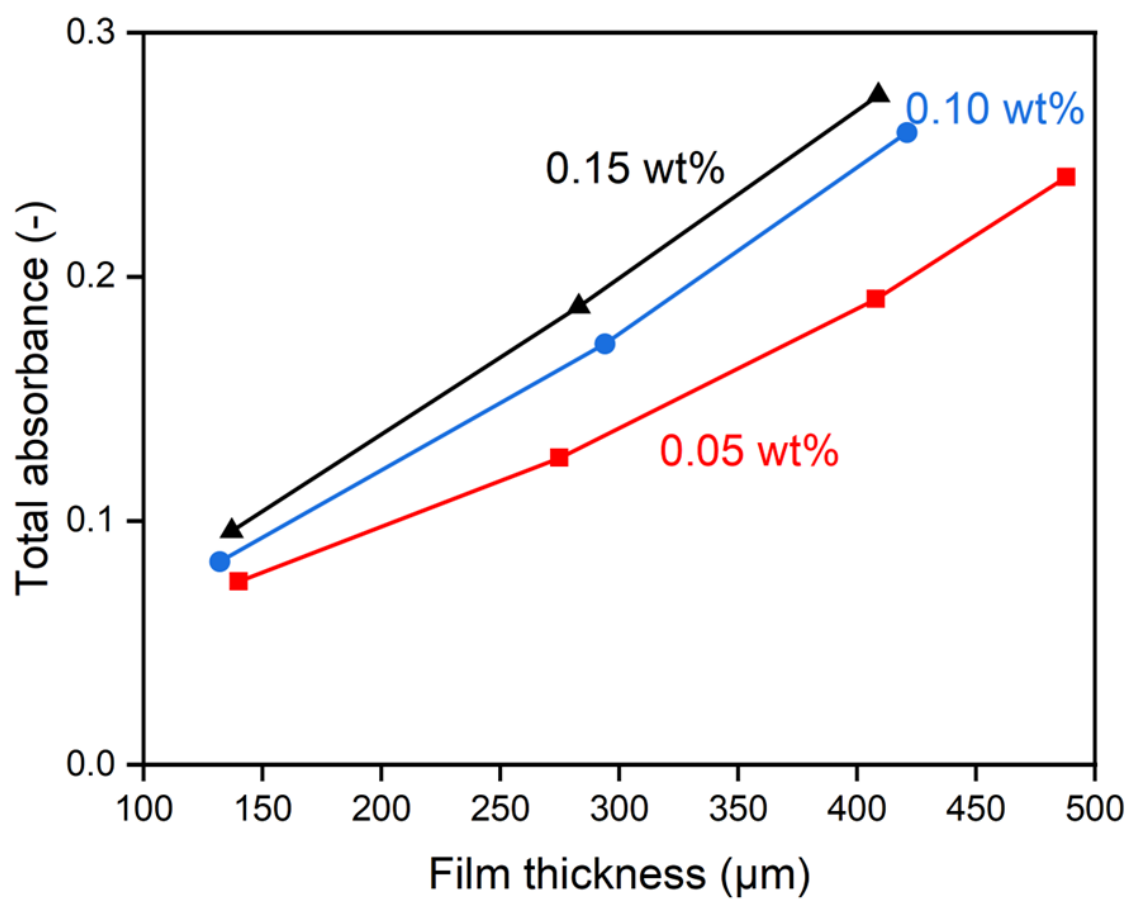

**Fig. S15** Change in total absorbance of CD@EVA films with different CD concentrations (0.05 wt%, 0.10 wt%, and 0.15 wt%) as a function of film thickness.

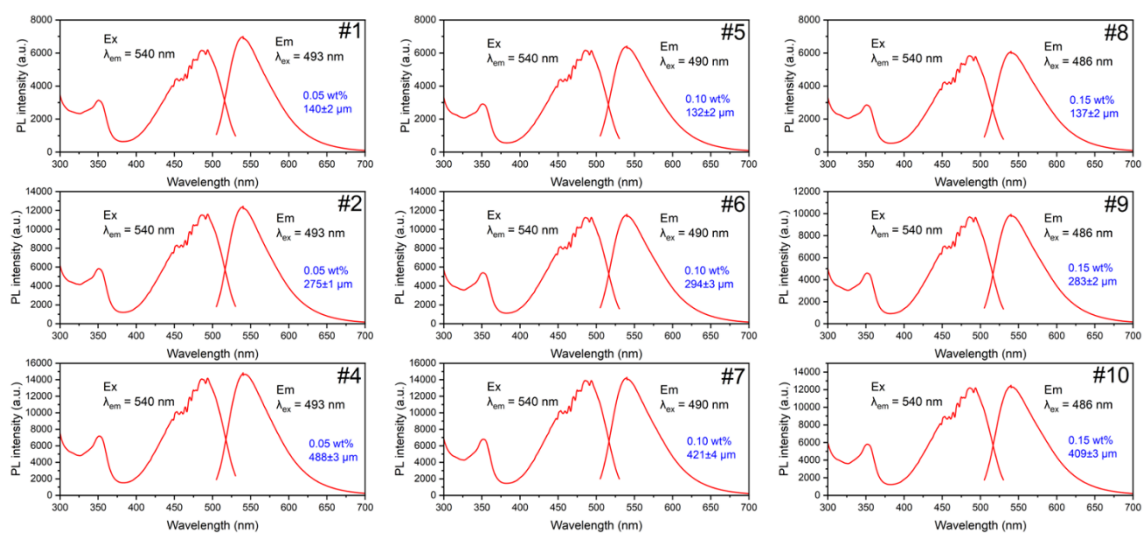

**Fig. S16** PL and PLE spectra of CDs@EVA films with different CD concentrations and thicknesses.

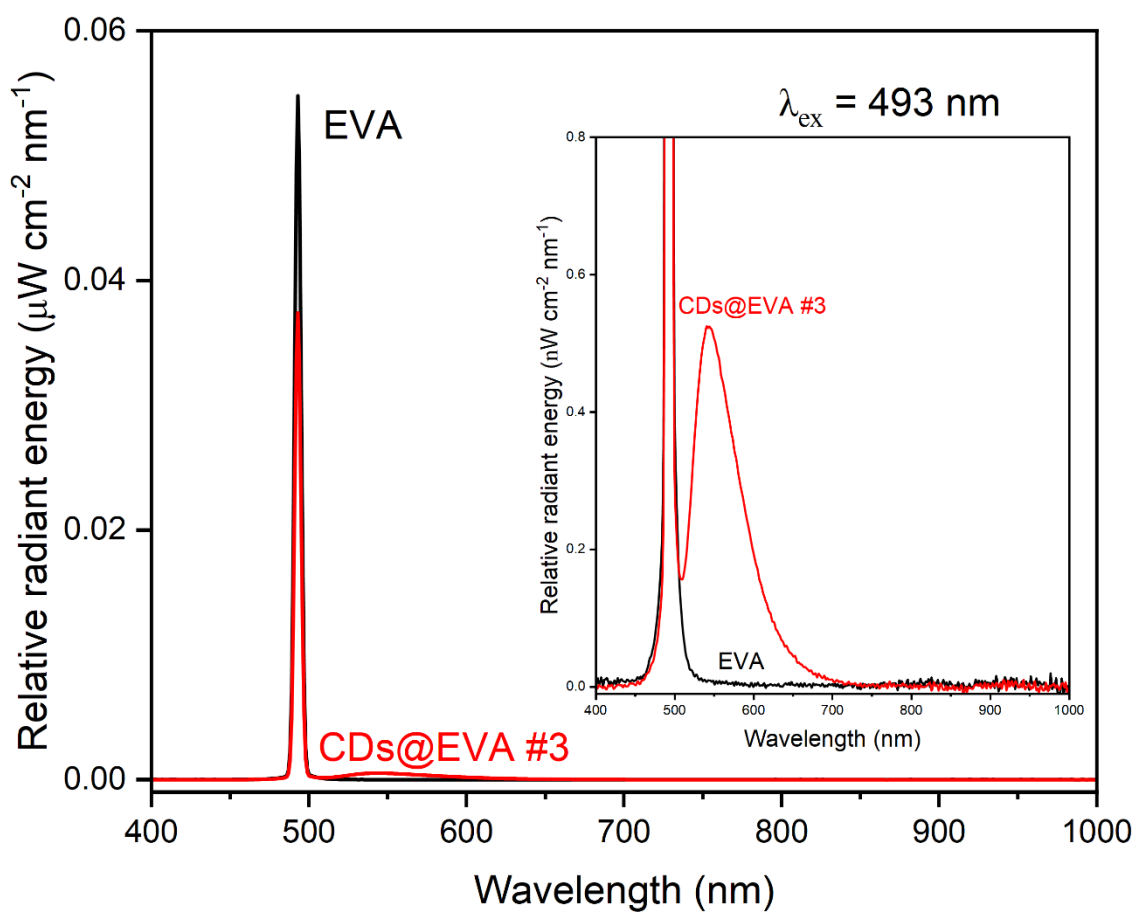

Fig. S17 PL spectra for evaluating the PLQY of CDs@EVA #3 film.

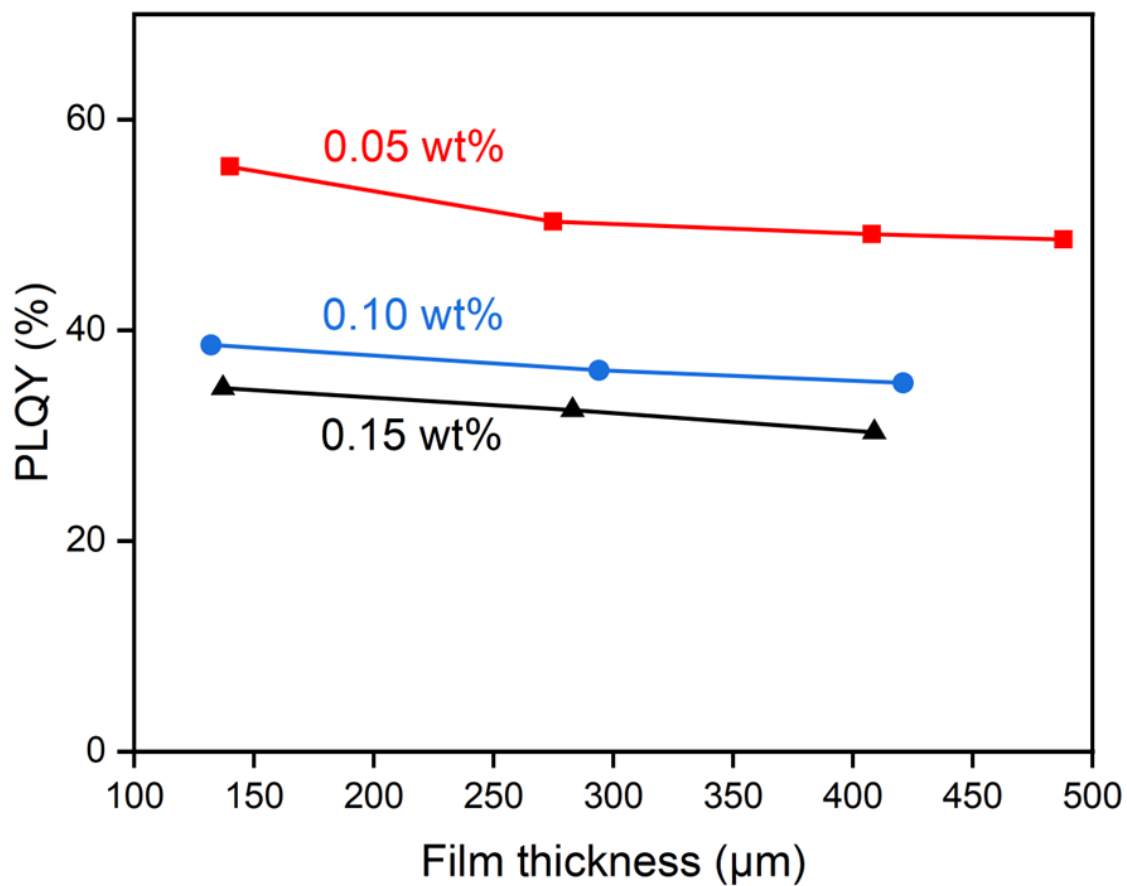

**Fig. S18** Change in PLQYs of CD@EVA films with varying CD concentrations (0.05 wt%, 0.10 wt%, and 0.15 wt%) as a function of film thickness.

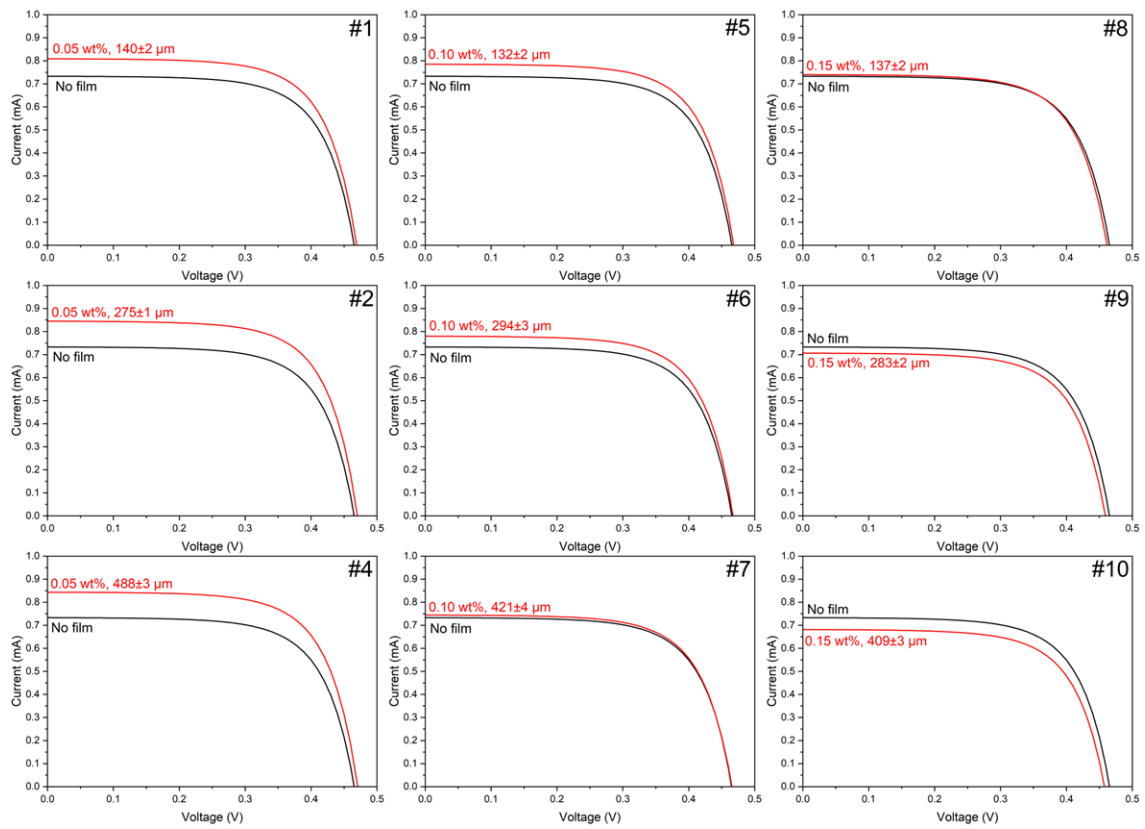

**Fig. S19** *I-V* curves of CDs@EVA films with different CD concentrations and thicknesses.



**Table S4** Results of  $I$ - $V$  curve measurements for LSC applications

| Sample      | $I_{sc}$<br>(mA) | $V_{oc}$<br>(V) | $FF$         | $\eta$<br>(%)  |
|-------------|------------------|-----------------|--------------|----------------|
| No film     | 0.733±0.0004     | 0.465±0.00026   | 0.684±0.0007 | 0.0190±0.00001 |
| EVA         | 0.774±0.0006     | 0.465±0.00004   | 0.684±0.0005 | 0.0202±0.00004 |
| CDs@EVA #1  | 0.809±0.0071     | 0.469±0.00026   | 0.686±0.0004 | 0.0212±0.00020 |
| CDs@EVA #2  | 0.845±0.0094     | 0.470±0.00064   | 0.688±0.0019 | 0.0223±0.00031 |
| CDs@EVA #3  | 0.855±0.0092     | 0.471±0.00064   | 0.688±0.0013 | 0.0226±0.00031 |
| CDs@EVA #4  | 0.843±0.0091     | 0.471±0.00038   | 0.688±0.0013 | 0.0223±0.00030 |
| CDs@EVA #5  | 0.785±0.0035     | 0.468±0.00064   | 0.685±0.0013 | 0.0206±0.00015 |
| CDs@EVA #6  | 0.780±0.0043     | 0.467±0.00059   | 0.685±0.0021 | 0.0204±0.00019 |
| CDs@EVA #7  | 0.745±0.0048     | 0.465±0.00057   | 0.683±0.0012 | 0.0193±0.00018 |
| CDs@EVA #8  | 0.740±0.0045     | 0.462±0.00010   | 0.681±0.0006 | 0.0190±0.00013 |
| CDs@EVA #9  | 0.706±0.0048     | 0.459±0.00025   | 0.679±0.0012 | 0.0180±0.00016 |
| CDs@EVA #10 | 0.682±0.0033     | 0.458±0.00019   | 0.678±0.0010 | 0.0173±0.00011 |

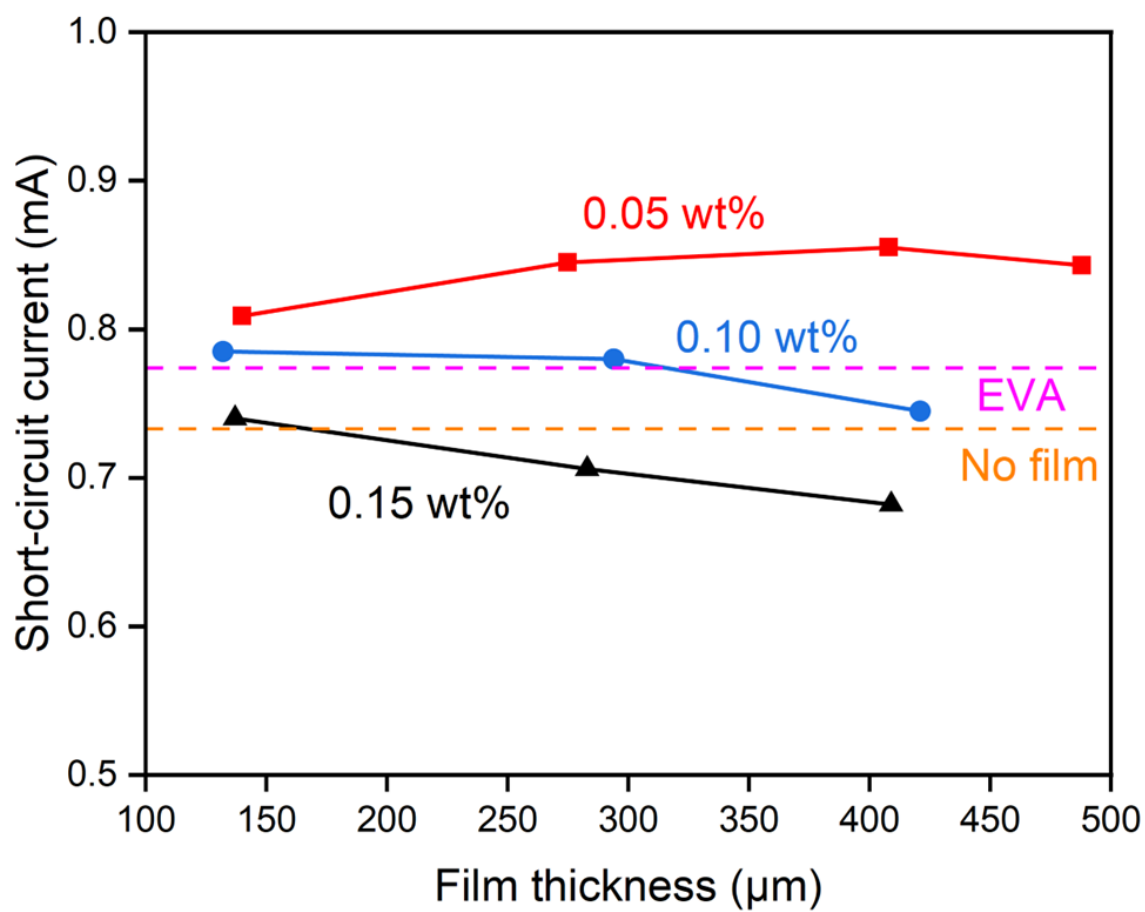

**Fig. S20** Change in short-circuit currents of CD@EVA films with varying CD concentrations (0.05 wt%, 0.10 wt%, and 0.15 wt%) as a function of film thickness. Dashed lines represent reference values for no film and EVA film.

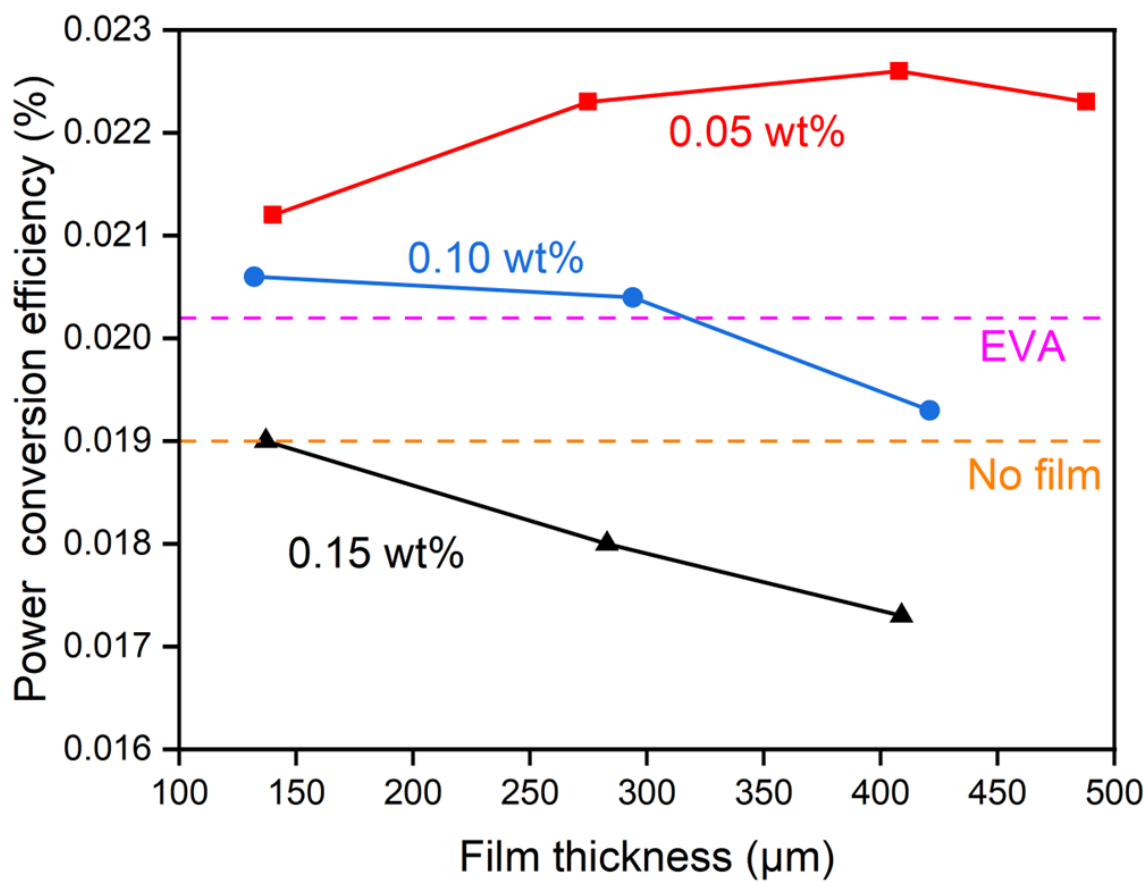

**Fig. S21** Change in  $\eta$  of CD@EVA films with different CD concentrations (0.05 wt%, 0.10 wt%, and 0.15 wt%) as a function of film thickness. Dashed lines represent reference values for no film and EVA film.

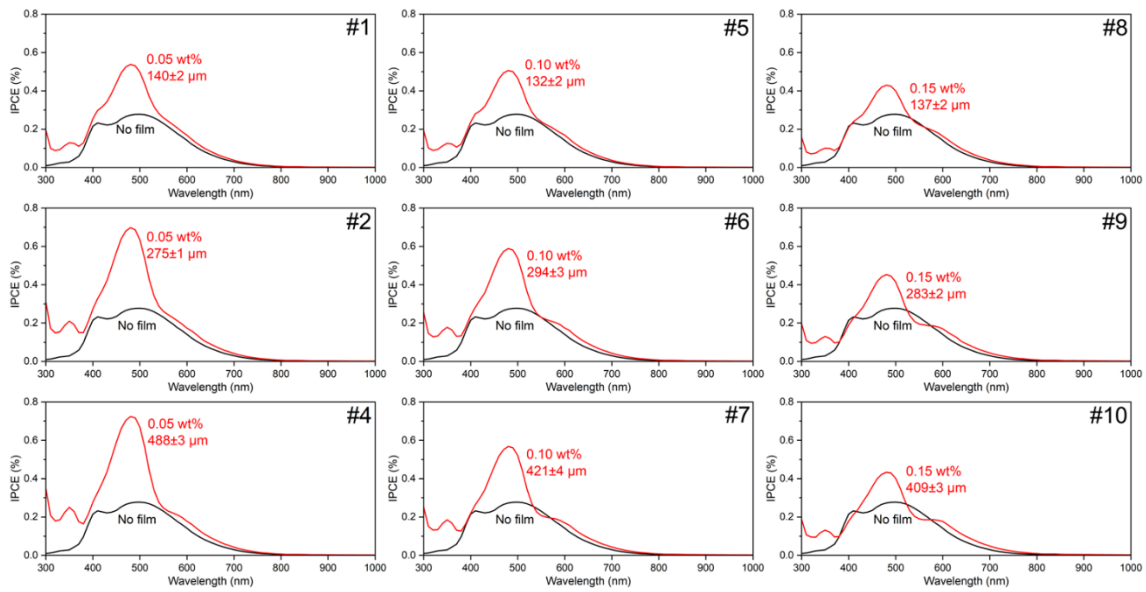

**Fig. S22** IPCE spectra of CDs@EVA films with different CD concentrations and thicknesses.

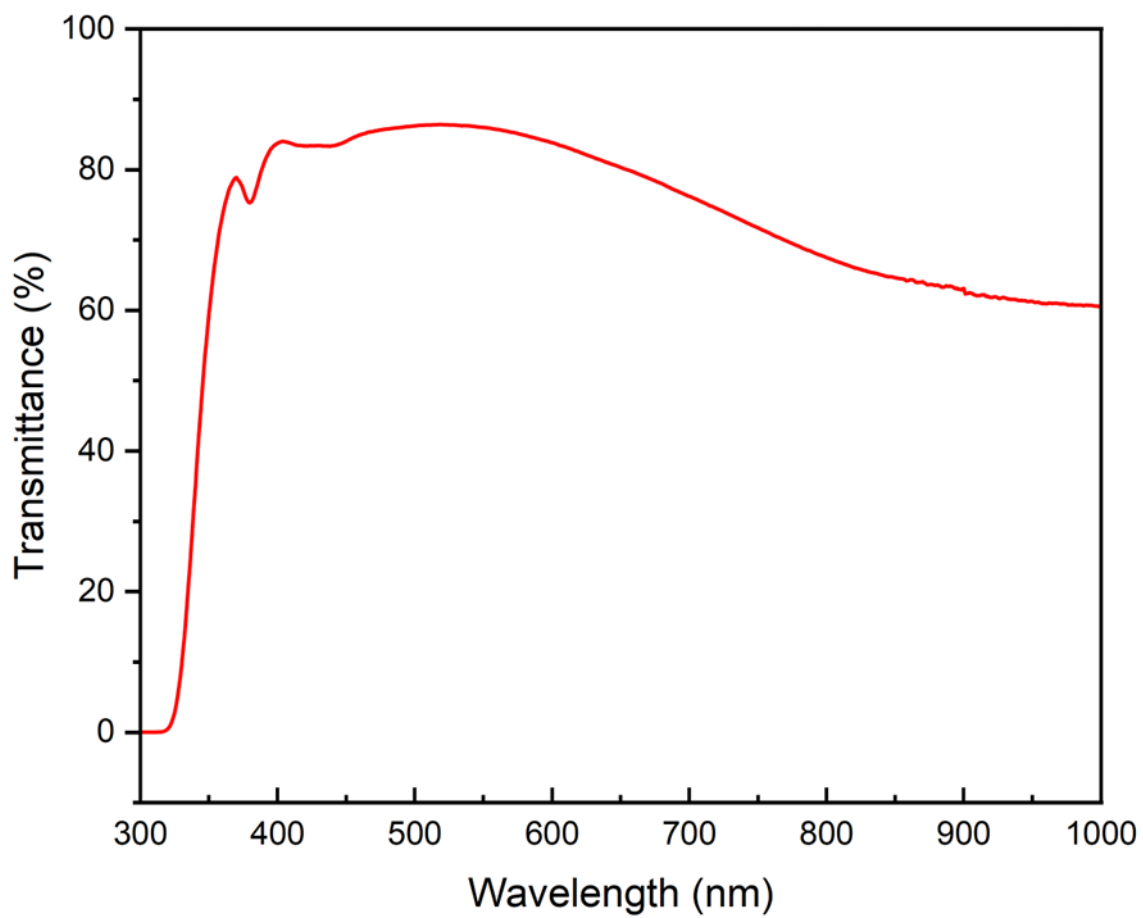

**Fig. S23** Transmission spectrum of soda glass plate (10 mm thickness).

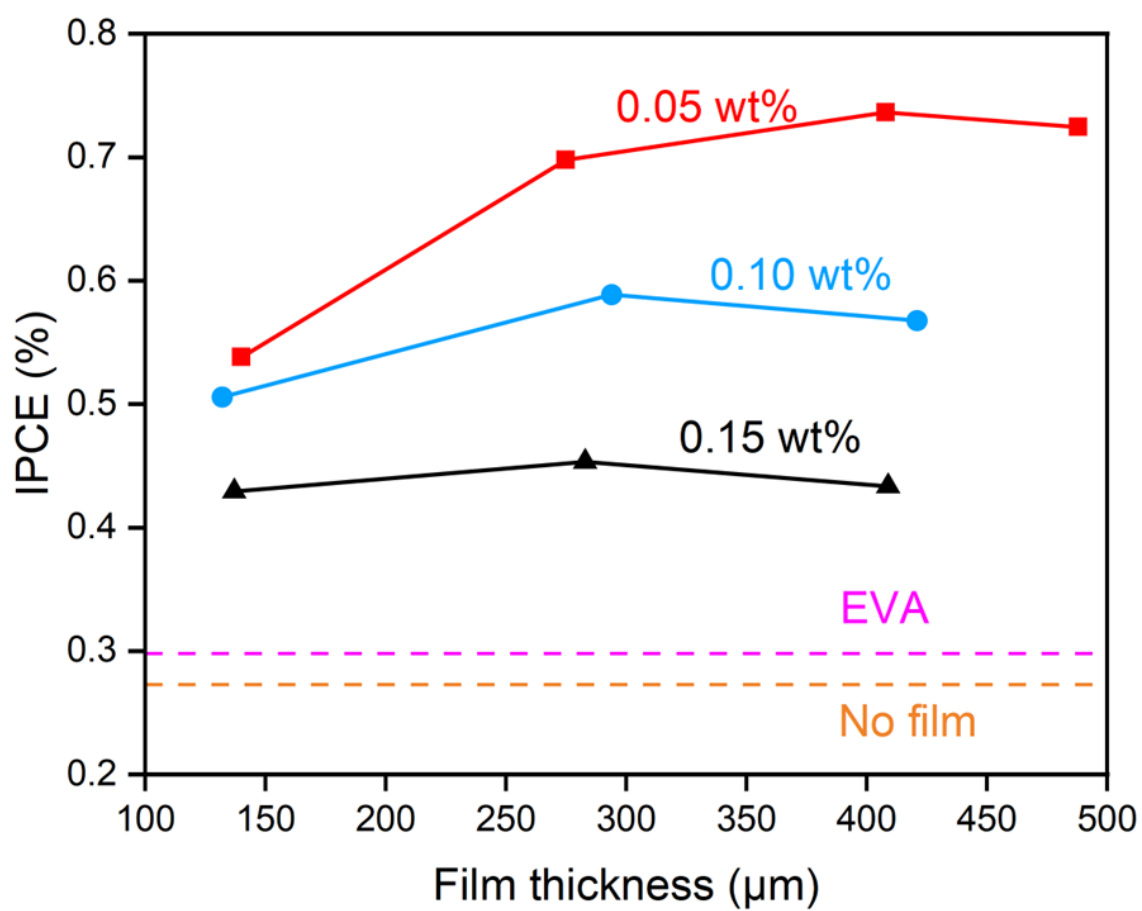

**Fig. S24** Change in maximum IPCE values of CD@EVA films with different CD concentrations (0.05 wt%, 0.10 wt%, and 0.15 wt%) as a function of film thickness. Dashed lines represent reference values for no film and EVA film.

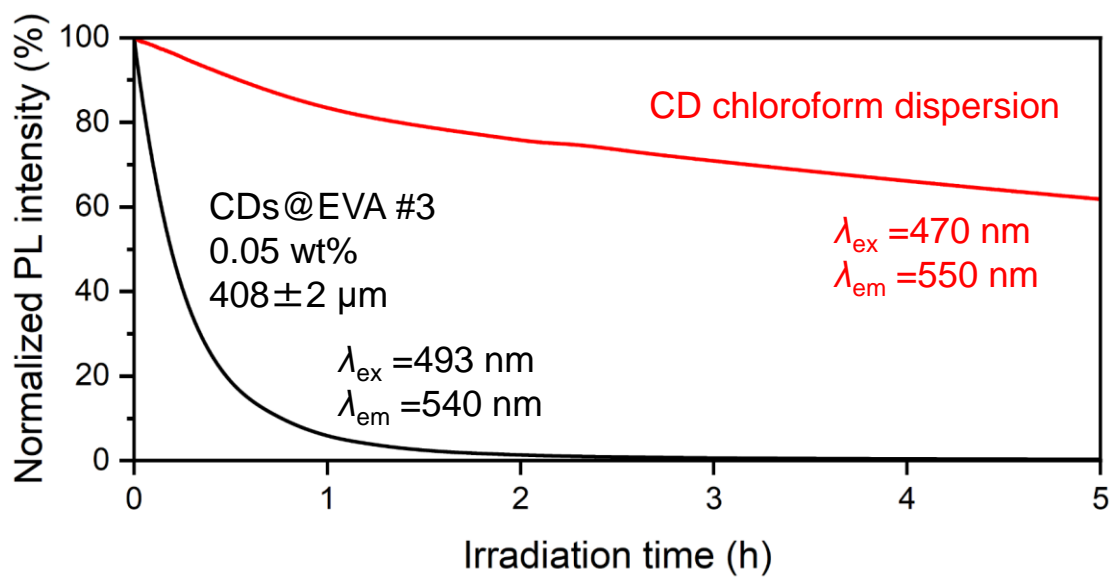

**Fig. S25** Change in PL intensity of CD chloroform dispersion and CDs@EVA #3 film under the continuous optimal excitation.

## References

- S1 Y. Zhou, D. Benetti, X. Tong, L. Jin, Z. M. Wang, D. Ma, H. Zhao and F. Rosei, *Nano Energy*, 2018, **44**, 378-387.
- S2 J. Li, H. Zhao, X. Zhao and X. Gong, *Nanoscale*, 2021, **13**, 9561-9569.
- S3 Y. Wu, Y. Zhan, W. Xin, W. Cao, J. Li, M. Chen, X. Jiang, J. Wang and Z. Sun, *ACS Appl. Energy Mater.*, 2022, **5**, 1781-1792.
- S4 Y. Li, P. Miao, W. Zhou, X. Gong and X. Zhao, *J. Mater. Chem. A*, 2017, **5**, 21452-21459.
- S5 Z. Wang, X. Zhao, Z. Guo, P. Miao and X. Gong, *Org. Electron.*, 2018, **62**, 284-289.
- S6 G. Liu, M. Zavelani-Rossi, G. Han, H. Zhao and A. Vomiero, *J. Mater. Chem. A*, 2023, **11**, 8950-8960.
- S7 W. Li, X. Wang, J. Lin, X. Meng, L. Wang, M. Wang, Q. Jing, Y. Song, A. Vomiero and H. Zhao, *Nano Energy*, 2024, **122**, 109289.
- S8 J. Lin, L. Wang, Q. Jing and H. Zhao, *Chem. Eng. J.*, 2024, **481**, 148441.
- S9 H. Zhao, G. Liu, S. You, F. V. Camargo, M. Zavelani-Rossi, X. Wang, C. Sun, B. Liu, Y. Zhang and G. Han, *Energy Environ. Sci.*, 2021, **14**, 396-406.
